# Supplementary material for: Diosmetin Mitigates Cognitive and Memory Impairment Provoked by Chronic Unpredictable Mild Stress in Mice
Source: PubMed Central journal article supplement (PMC7769643; doi:10.1155/2020/5725361), 2020-12-21
Supplement: 5725361.f1.pdf [file 5725361.f1.pdf]

**Supp. Table1.** The datasets of Shuttle Box test

**A**

| CUMS   |       |        |        |        |
|--------|-------|--------|--------|--------|
| Normal | Veh   | Dios10 | Dios20 | Dios40 |
| 34     | 3.45  | 18.18  | 60     | 42.42  |
| 32     | 8.2   | 21.52  | 12.2   | 46.47  |
| 31     | 16.3  | 60     | 47.84  | 30.1   |
| 46     | 12.09 | 22.91  | 28.02  | 60     |
| 55     | 11.14 | 60     | 60     | 42.08  |
| 28     | 25.1  | 31.81  | 24.35  | 42.4   |

**B**

| Normal |        |        |        |
|--------|--------|--------|--------|
| Veh    | Dios10 | Dios20 | Dios40 |
| 34     | 28.18  | 50     | 50.42  |
| 32     | 30.52  | 22.2   | 46.47  |
| 31     | 45     | 47.84  | 35.1   |
| 46     | 32.91  | 38.02  | 50     |
| 55     | 55     | 50     | 42.08  |
| 28     | 31.81  | 44.35  | 40.4   |

Secondary latency (T2) on passive avoidance memory in shuttle box test in CUMS conditions (A) and in non-stressful conditions (B). Normal: Healthy group. Veh: Diosmetin solvent received group. Dios: Diosmetin received group (10, 20, 40 mg/kg).

**Supp. Table 2.** The datasets of Novel Object test

**A**

| T2     |       |        |        |        |
|--------|-------|--------|--------|--------|
| CUMS   |       |        |        |        |
| Normal | Veh   | Dios10 | Dios20 | Dios40 |
| 88.11  | 43.89 | 77.32  | 88.11  | 91.16  |
| 63     | 41.68 | 99.11  | 98.21  | 101.13 |
| 66     | 42.77 | 91.18  | 55.39  | 156    |
| 88     | 52.92 | 80     | 88.19  | 139    |
| 73     | 55.89 | 53.19  | 101    | 145    |
| 101    | 38    | 88.17  | 78.21  | 188    |

**B**

| T2     |        |        |        |
|--------|--------|--------|--------|
| Normal |        |        |        |
| Veh    | Dios10 | Dios20 | Dios40 |
| 88.11  | 102.16 | 102.16 | 102.16 |
| 63     | 115.13 | 121.13 | 121.13 |
| 66     | 116    | 146    | 156    |
| 88     | 139    | 127    | 139    |
| 73     | 105    | 105    | 155    |
| 101    | 88     | 140    | 188    |

**C**

| Recognition Index |          |          |          |          |
|-------------------|----------|----------|----------|----------|
| CUMS              |          |          |          |          |
| Normal            | Veh      | Dios10   | Dios20   | Dios40   |
| 0.590563          | 0.306923 | 0.743462 | 0.778082 | 0.856204 |
| 0.765483          | 0.320615 | 0.883176 | 0.794322 | 0.892507 |
| 0.669794          | 0.279543 | 0.75775  | 0.586138 | 0.917647 |
| 0.594172          | 0.315    | 0.706714 | 0.870497 | 0.91986  |
| 0.52259           | 0.388125 | 0.814548 | 0.892936 | 0.872916 |
| 0.695838          | 0.357716 | 0.844945 | 0.886634 | 0.925561 |

**D**

| Recognition Index |          |          |          |
|-------------------|----------|----------|----------|
| Normal            |          |          |          |
| Veh               | Dios10   | Dios20   | Dios40   |
| 0.590563          | 0.756204 | 0.806204 | 0.896204 |
| 0.765483          | 0.892507 | 0.812507 | 0.892507 |
| 0.669794          | 0.610647 | 0.717647 | 0.987647 |
| 0.594172          | 0.51986  | 0.91986  | 0.91986  |
| 0.52259           | 0.772916 | 0.772916 | 0.872916 |
| 0.695838          | 0.625561 | 0.655561 | 0.925561 |

The duration of new object recognition (T2) in CUMS condition (A) and in stress-free condition (B). The datasets of recognition index in CUMS condition (C) and in stress-free condition (D) in the novel object test. Normal: Healthy group. Veh: Diosmetin solvent received group. Dios: Diosmetin received group (10, 20, 40 mg/kg).

**Supp. Table 3.** The datasets of serum Corticosterone level

**A**

| CUMS   |        |        |        |        |
|--------|--------|--------|--------|--------|
| Normal | Veh    | Dios10 | Dios20 | Dios40 |
| 22.49  | 83.17  | 88.95  | 60.18  | 24.33  |
| 12.56  | 93.96  | 73.147 | 55.741 | 28.936 |
| 10.91  | 70.55  | 53.96  | 46.952 | 38.144 |
| 23.002 | 76.542 | 90.341 | 67.531 | 23.982 |
| 27.098 | 52.761 | 64.067 | 41.788 | 58.064 |

**B**

| Normal |        |        |        |
|--------|--------|--------|--------|
| Veh    | Dios10 | Dios20 | Dios40 |
| 22.49  | 16.87  | 14.76  | 4.33   |
| 12.56  | 10.45  | 9.91   | 12.66  |
| 10.91  | 9.22   | 11.61  | 7.91   |
| 23.002 | 12.004 | 8.9311 | 8.428  |
| 27.098 | 12.237 | 11.437 | 4.067  |

Corticosterone level in CUMS condition (A) and stress-free conditions (B). Normal: Healthy group. Veh: Diosmetin solvent received group. Dios: Diosmetin received group (10, 20, 40 mg/kg).

**Supp. Table 4.** The datasets of Antioxidant Capacity

**A**

| Brain  |     |        |        |        |
|--------|-----|--------|--------|--------|
| CUMS   |     |        |        |        |
| Normal | Veh | Dios10 | Dios20 | Dios40 |
| 356    | 96  | 231    | 259    | 358    |
| 398    | 130 | 251    | 275    | 342    |
| 452    | 88  | 224    | 285    | 333    |
| 402    | 85  | 254    | 241    | 359    |
| 400    | 123 | 201    | 264    | 305    |
| 361    | 62  | 213    | 294    | 330    |
|        | 98  | 245    | 278    | 345    |

**B**

| Brain  |        |        |        |
|--------|--------|--------|--------|
| Normal |        |        |        |
| Veh    | Dios10 | Dios20 | Dios40 |
| 356    | 437    | 451    | 546    |
| 398    | 392    | 347    | 592    |
| 452    | 333    | 421    | 603    |
| 402    | 412    | 510    | 512    |
| 400    | 446    | 509    | 589    |
| 361    | 412    | 455    | 491    |
|        | 445    | 413    | 472    |

**C**

| Serum  |     |        |        |        |
|--------|-----|--------|--------|--------|
| CUMS   |     |        |        |        |
| Normal | Veh | Dios10 | Dios20 | Dios40 |
| 566    | 231 | 298    | 311    | 451    |
| 575    | 252 | 259    | 351    | 402    |
| 599    | 261 | 301    | 317    | 498    |
| 600    | 270 | 310    | 300    | 431    |
| 581    | 202 | 288    | 341    | 485    |
| 531    | 212 | 265    | 318    | 471    |
|        | 215 | 292    | 325    | 432    |

**D**

| Serum  |        |        |        |
|--------|--------|--------|--------|
| Normal |        |        |        |
| Veh    | Dios10 | Dios20 | Dios40 |
| 566    | 689    | 616    | 646    |
| 575    | 598    | 698    | 798    |
| 599    | 561    | 701    | 711    |
| 600    | 750    | 514    | 654    |
| 581    | 680    | 784    | 704    |
| 531    | 501    | 601    | 841    |
|        | 575    | 623    | 725    |

Antioxidant capacity of brain tissue in CUMS (A), under stress-free conditions (B), serum antioxidant capacity CUMS conditions (C) and stress-free conditions (D). Normal: Healthy group. Veh: Diosmetin solvent received group. Dios: Diosmetin received group (10, 20, 40 mg/kg).

**Supp. Table 5.** The datasets of Malondialdehyde level

**A**

| Brain  |     |        |        |        |
|--------|-----|--------|--------|--------|
| CUMS   |     |        |        |        |
| Normal | Veh | Dios10 | Dios20 | Dios40 |
| 135    | 400 | 196    | 212    | 195    |
| 165    | 417 | 201    | 228    | 159    |
| 255    | 428 | 236    | 208    | 180    |
| 151    | 458 | 215    | 298    | 161    |
| 188    | 429 | 235    | 224    | 155    |
| 104    | 431 | 210    | 220    | 215    |
| 107    | 418 | 298    | 234    | 199    |

**B**

| Brain  |        |        |        |
|--------|--------|--------|--------|
| Normal |        |        |        |
| Veh    | Dios10 | Dios20 | Dios40 |
| 135    | 110    | 98     | 73     |
| 165    | 132    | 118    | 65     |
| 255    | 180    | 105    | 129    |
| 151    | 109    | 201    | 86     |
| 188    | 129    | 162    | 155    |
| 104    | 174    | 115    | 106    |
| 107    | 169    | 123    | 76     |

**C**

| Serum  |     |        |        |        |
|--------|-----|--------|--------|--------|
| CUMS   |     |        |        |        |
| Normal | Veh | Dios10 | Dios20 | Dios40 |
| 209    | 487 | 199    | 236    | 82     |
| 211    | 463 | 201    | 258    | 114    |
| 185    | 496 | 201    | 206    | 111    |
| 188    | 425 | 245    | 237    | 154    |
| 145    | 479 | 236    | 199    | 89     |
| 188    | 417 | 254    | 211    | 95     |
|        | 427 | 301    | 186    | 104    |

**D**

| Serum  |        |        |        |
|--------|--------|--------|--------|
| Normal |        |        |        |
| Veh    | Dios10 | Dios20 | Dios40 |
| 209    | 99     | 183    | 82     |
| 211    | 210    | 91     | 114    |
| 185    | 131    | 83     | 91     |
| 188    | 116    | 147    | 89     |
| 145    | 92     | 69     | 72     |
| 188    | 201    | 166    | 95     |
|        | 119    | 74     | 104    |

MDA of hippocampal tissue in CUMS condition (A), in stress-free condition (B), serum MDA levels in CUMS condition (C) and in stress-free condition (D). Normal: Healthy group. Veh: Diosmetin solvent received group. Dios: Diosmetin received group (10, 20, 40 mg/kg).
